# Supplementary material for: Photochromism and single-component white light emission from a metalloviologen complex based on 1,5-naphthyridine
Source: Royal Society of Chemistry journal article supplement (doi:10.1039/d3dt04250b), 2024-01-01
Supplement: d3dt04250b1.pdf [file d3dt04250b1.pdf]

## *Electronic Supplementary Information*

### **Photochromism and single-component white light emission from a metalloviologen complex based on 1,5-naphthyridine**

Ning-Ning Zhang,<sup>\*a</sup> Ya-Nan Zhang,<sup>a</sup> Li Li,<sup>c</sup> Zhen-Yu Li,<sup>b</sup> Ya-Tong Liu,<sup>a</sup> Yunyun Dong,<sup>a</sup> Yong Yan<sup>\*a</sup> and Ming-Sheng Wang<sup>d</sup>

<sup>a</sup>*School of Chemistry and Chemical Engineering, Liaocheng University, Liaocheng, Shandong 252000, P. R. China.*

<sup>b</sup>*School of Environmental and Material Engineering, Yantai University, Yantai 264005, P. R. China.*

<sup>c</sup>*School of Materials Science and Engineering, Henan Polytechnic University, Jiaozuo, 454000, P. R. China.*

<sup>d</sup>*State Key Laboratory Structural Chemistry, Fujian Institute of Research on the Structure of Matter, Chinese Academy of Science, Fuzhou 350002, P. R. China.*

*\*Email: zhangningning@lcu.edu.cn (N. N. Zhang); yanyong@lcu.edu.cn (Y. Yan)*

## Additional graphics

**Table S1.** Crystal data and structural refinements for compound **1**.

|                                                    | <b>Compound 1</b>                                              |
|----------------------------------------------------|----------------------------------------------------------------|
| <b>CCDC</b>                                        | 2307757                                                        |
| <b>Formula</b>                                     | CdCl <sub>2</sub> C <sub>8</sub> H <sub>6</sub> N <sub>2</sub> |
| <b>Mr</b>                                          | 313.45                                                         |
| <b>Crystal size (mm<sup>3</sup>)</b>               | 0.42*0.17*0.1                                                  |
| <b>Crystal system</b>                              | monoclinic                                                     |
| <b>Space group</b>                                 | C2/m                                                           |
| <b><i>a</i> (Å)</b>                                | 15.1638(14)                                                    |
| <b><i>b</i> (Å)</b>                                | 3.8071(4)                                                      |
| <b><i>c</i> (Å)</b>                                | 8.2899(7)                                                      |
| <b><i>α</i> (deg)</b>                              | 90                                                             |
| <b><i>β</i> (deg)</b>                              | 103.338(5)                                                     |
| <b><i>γ</i> (deg)</b>                              | 90                                                             |
| <b><i>V</i> (Å<sup>3</sup>)</b>                    | 465.67(8)                                                      |
| <b><i>D</i><sub>calcd</sub> (g/cm<sup>3</sup>)</b> | 2.236                                                          |
| <b><i>Z</i></b>                                    | 2                                                              |
| <b><i>F</i>(000)</b>                               | 300                                                            |
| <b>Abs coeff (mm<sup>-1</sup>)</b>                 | 2.865                                                          |
| <b><i>R</i><sub>1</sub><sup>a</sup></b>            | 0.0331(478)                                                    |
| <b><i>ωR</i><sub>2</sub><sup>b</sup></b>           | 0.0903(480)                                                    |
| <b>GOF on <i>F</i><sup>2</sup></b>                 | 1.177                                                          |

$${}^aR_1 = \sum ||F_o| - |F_c|| / \sum |F_o|;$$

$${}^b\omega R_2 = \{ \sum \omega [(F_o)^2 - (F_c)^2]^2 / \sum \omega [(F_o)_2]^2 \}^{1/2}.$$

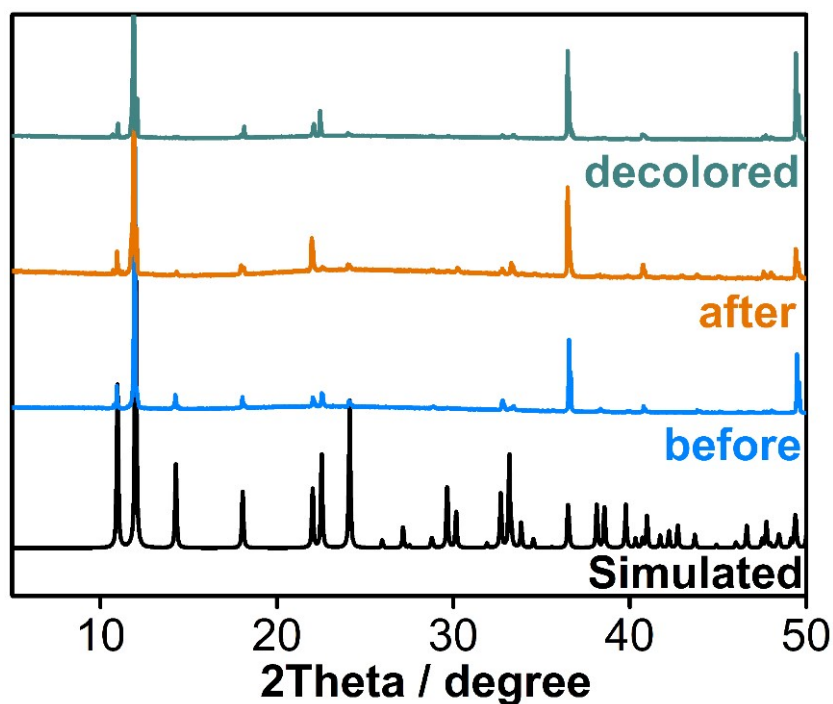

**Fig. S1** PXRD patterns of compound **1**: **simulated**, simulated data using single-crystal data; **before**, measured data for as-synthesized samples; **after**, measured data for colored samples; **decolorized**, measured data for its heated sample at 200 °C for 1 day.

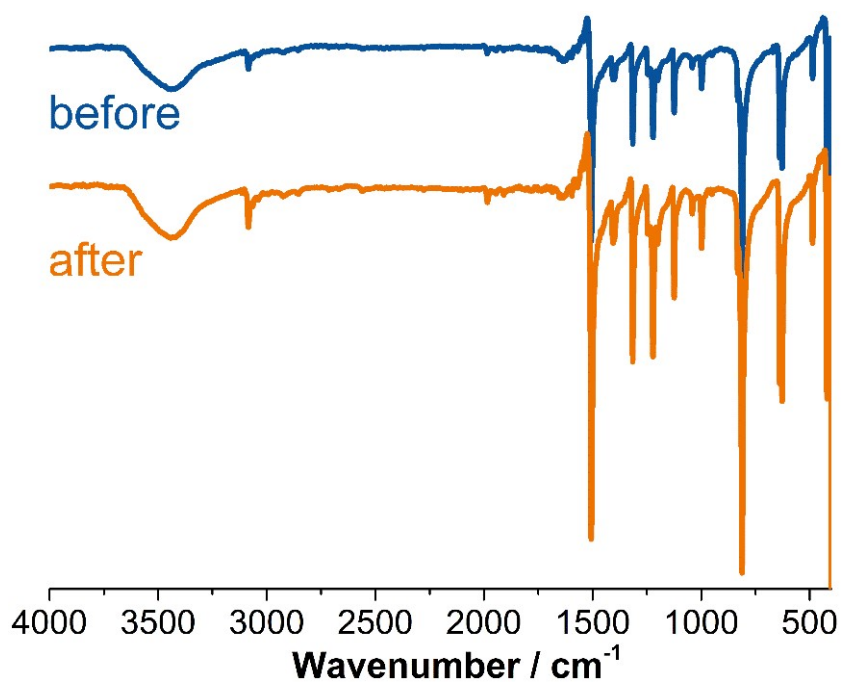

**Fig. S2** IR spectra of compound **1**: **before**, measured data for as-synthesized samples; **after**, measured data for colored samples.

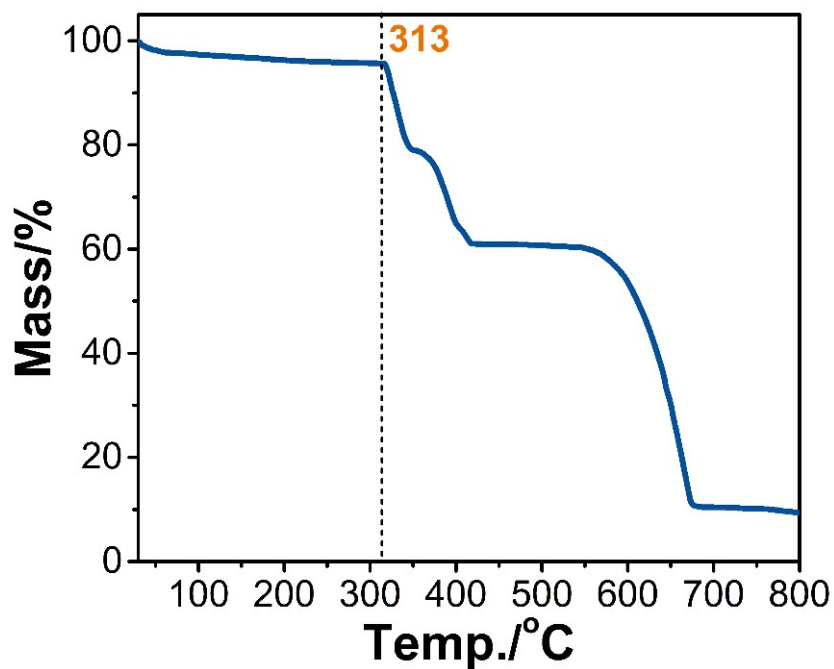

Fig. S3 Thermogravimetric curve of compound **1** under N<sub>2</sub> with heating rate of 10 °C/min.

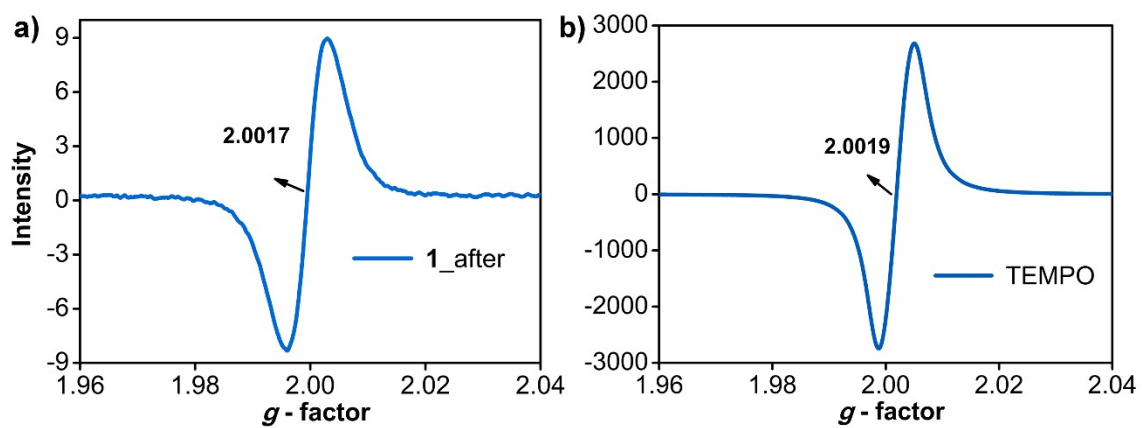

Fig. S4 ESR spectra of irradiated **1** (26 mg, a) and **TEMPO** (0.3 mg, b) in the solid state under the same test conditions.

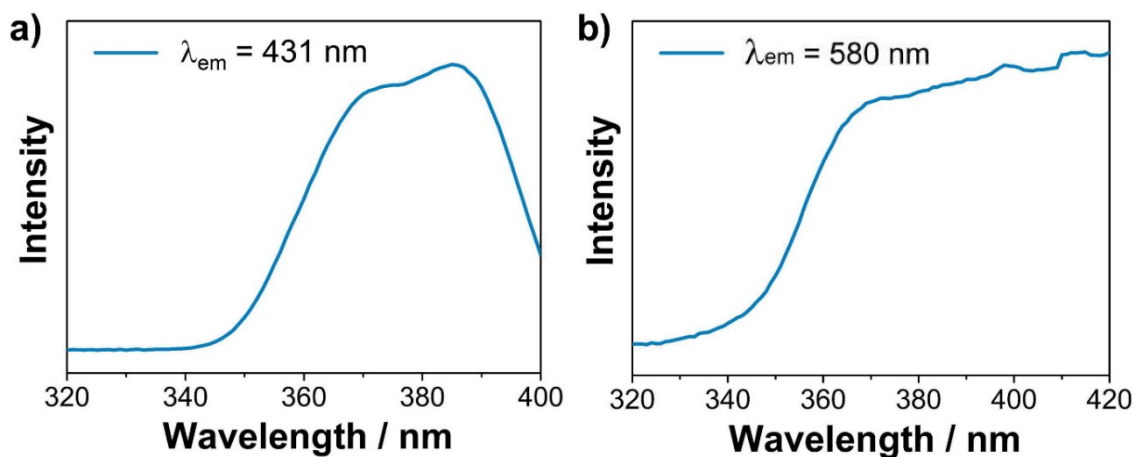

**Fig. S5** The excitation spectra of fresh solid-state sample **1** monitored at 431 nm (a) and 580 nm (b), respectively.

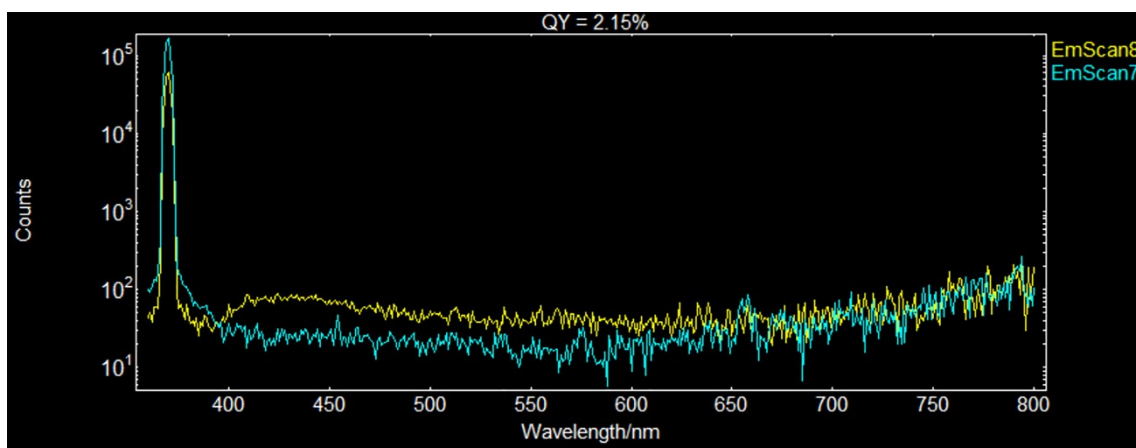

**Fig. S6** Spectral diagram of quantum yield test of **1** at  $\lambda_{ex} = 370 \text{ nm}$ .

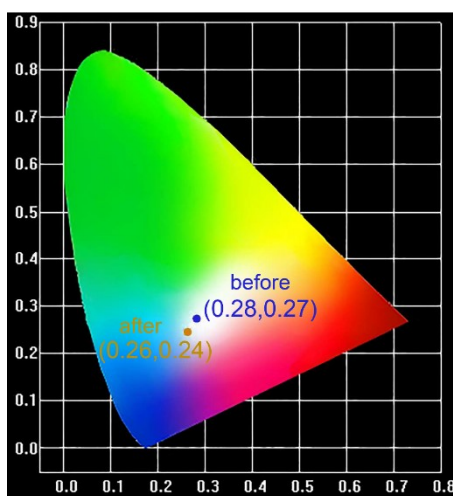

**Fig. S7** The CIE maps of **1** before and after irradiation at excitation wavelength of 365 nm.

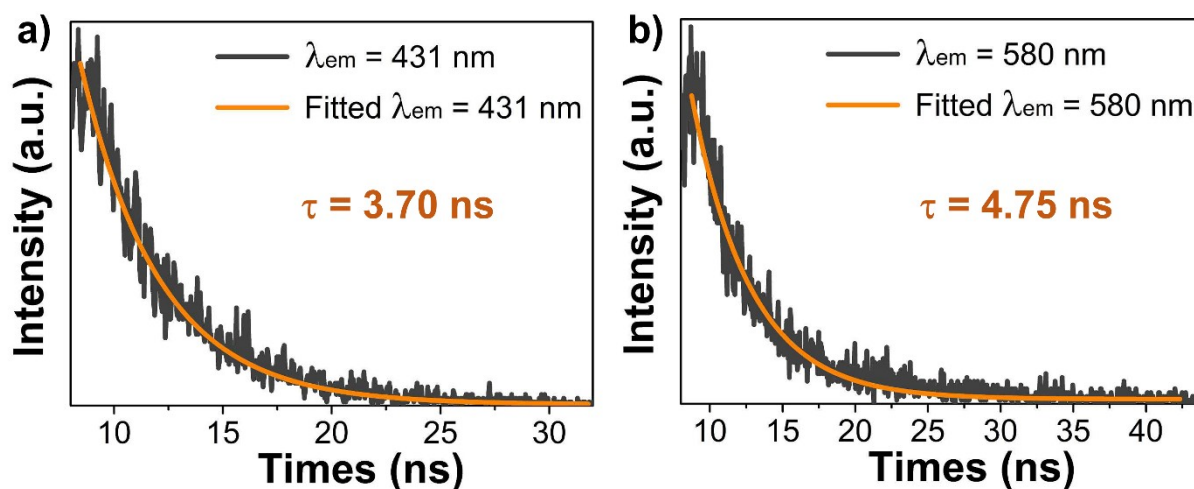

Fig. S8 Lifetime curves of **1** monitored at 431 nm (a) and 580 nm (b), respectively.

**Table S2.** The CIE coordinates, Color Temperature (CT) and Color-rendering Index (CRI) of fresh solid-state sample **1** at different excitation wavelength from 340 to 370 nm.

| $\lambda_{\text{ex}}$ of Complex <b>1</b> | CIE            | CT (T/K) | CRI          |
|-------------------------------------------|----------------|----------|--------------|
| 340 nm                                    | (0.401, 0.393) | 3615     | 82.54        |
| 350 nm                                    | (0.371, 0.366) | 4191     | 87.08        |
| 360 nm                                    | (0.300, 0.293) | 7981.    | <b>94.04</b> |
| 365 nm_before                             | (0.283, 0.272) | 10640    | <b>92.94</b> |
| 365 nm_after                              | (0.262, 0.244) | 19603    | <b>92.49</b> |
| 370 nm                                    | (0.269, 0.252) | 15718    | <b>92.00</b> |

**Table 3.** Typical part single-component white light emitting compounds and CRI values at specific excitation wavelengths ( $\lambda_{\text{ex}}$ ).

| Compounds <sup>ref</sup>                                                                                                                   | CRI values   | $\lambda_{\text{ex}}$ (nm) |
|--------------------------------------------------------------------------------------------------------------------------------------------|--------------|----------------------------|
| (H <sub>2</sub> DABCO)(Pb <sub>2</sub> Cl <sub>6</sub> ) <sup>1</sup>                                                                      | 96           | 300                        |
| Ba <sub>2</sub> [Sn(OH) <sub>6</sub> ][B(OH) <sub>4</sub> ] <sub>2</sub> <sup>2</sup>                                                      | 94.1         | 283                        |
| <b>Compound 1 [this work]</b>                                                                                                              | <b>94.04</b> | <b>360</b>                 |
| [Mg <sub>3</sub> (OH) <sub>2</sub> (1,4-NDC) <sub>2</sub> (dppe)(H <sub>2</sub> O)] <sup>3</sup>                                           | 93.12        | 380                        |
| {[Zn(bpdo)(fum)(H <sub>2</sub> O) <sub>2</sub> ]} <sub>n</sub> <sup>4</sup>                                                                | 92.1         | 370                        |
| (C <sub>6</sub> H <sub>5</sub> C <sub>2</sub> H <sub>4</sub> NH <sub>3</sub> ) <sub>2</sub> PbBr <sub>2</sub> Cl <sub>2</sub> <sup>5</sup> | 91           | 385                        |

|                                                 |    |     |
|-------------------------------------------------|----|-----|
| $(C_5H_{14}N_2)PbBr_4^6$                        | 90 | 330 |
| $(C_7H_{16}N)PbBr_3^6$                          | 89 | 330 |
| $(C_6H_{14}N)PbBr_3^6$                          | 88 | 330 |
| 1-(4-carboxyphenyl)-1,2,3-triazole <sup>7</sup> | 88 | 370 |
| $(C_5H_{14}N_2)_2Pb_3Br_{10}^6$                 | 86 | 330 |
| 2-MOP <sup>8</sup>                              | 86 | 383 |
| $[H_2DABCO][Ag_2Br_4(DABCO)]^9$                 | 85 | 376 |
| $(3APr)PbCl_4^{10}$                             | 85 | 330 |
| $(C_6H_{16}N_2)PbBr_4^6$                        | 84 | 330 |
| $(2meptH_2)PbCl_4^{11}$                         | 84 | 330 |
| 1-(4-acetylphenyl)-1,2,3-triazole <sup>7</sup>  | 83 | 376 |
| $(3APr)PbBr_4^{10}$                             | 83 | 330 |
| $[DMEDA]PbCl_4^{12}$                            | 78 | 365 |
| $(C_6H_{16}N_2)_3Pb_2Br_{10}^6$                 | 77 | 330 |
| $(3APr)PbI_4^{10}$                              | 77 | 330 |
| $(C_6H_{16}N_2)PbBr_4^6$                        | 76 | 330 |
| $[DMPDA]PbCl_4^{12}$                            | 75 | 377 |

## References

1. G.-E Wang, G. Xu, M.-S. Wang, L.-Z. Cai, W.-H. Li and G.-C. Guo, Semiconductive 3-D haloplumbate framework hybrids with high color rendering index white-light emission, *Chem. Sci.*, 2015, **6**, 7222–7226.
2. M.-X. Yu, C.-P. Liu, Y.-F. Zhao, S.-C. Li, Y.-L. Yu, J.-Q. Lv, L. Chen, F.-L. Jiang and M.-C. Hong, White-Light Emission and Circularly Polarized Luminescence from a Chiral Copper(I) Coordination Polymer through Symmetry-Breaking Crystallization. *Angew. Chem. Int. Ed.*, 2023, **62**, e202201590.
3. Z.-F. Wu, B. Tan, J.-Y. Wang, C.-F. Du, Z.-H. Deng and X.-Y. Huang. Tunable photoluminescence and direct whitelight emission in Mg-based coordination networks, *Chem. Commun.*, 2015, **51**, 157–160.

4. N.-N. Zhang, L.-D. Xin, L. Li, Y.-N. Zhang, P.-P. Wu, Y.-F. Han, Y. Yan and K.-G. Qu. Multifunctional Crystalline Coordination Polymers Constructed from 4,4'-Bipyridine-*N,N'*-dioxide: Photochromism, White-Light Emission, and Photomagnetism, *ACS Omega*, 2023, **8**, 34017–34021.
5. S. Yang, Z. Lin, J. Wang, Y. Chen, Z. Liu, E. Yang, J. Zhang and Q. Ling, High Color Rendering Index White-Light Emission from UV-Driven LEDs Based on Single Luminescent Materials: Two-Dimensional Perovskites  $(\text{C}_6\text{H}_5\text{C}_2\text{H}_4\text{NH}_3)_2\text{PbBr}_x\text{Cl}_{4-x}$ , *ACS Appl. Mater. Interfaces*, 2018, **10**, 15980–15987.
6. L. Mao, P. Guo, M. Kepenekian, I. Hadar, C. Katan, J. Even, R. D. Schaller, C. C. Stoumpos and M. G. Kanatzidis, Structural Diversity in White-Light-Emitting Hybrid Lead Bromide Perovskites, *J. Am. Chem. Soc.*, 2018, **140**, 13078–13088.
7. N.-N. Zhang, C. Sun, X.-M. Jiang, X.-S. Xing, Y. Yan, L.-Z. Cai, M.-S. Wang and G.-C. Guo, Single-component small-molecule white light organic phosphors, *Chem. Commun.*, 2017, **53**, 9269–9272.
8. H. Hu, S. A. Morris, X. Qiao, D. Zhao, T. Salim, B. Chen, E. E. M. Chia and Y. M. Lam, Molecular engineering of two-dimensional hybrid perovskites with broadband emission for white light-emitting diodes, *J. Mater. Chem. C*, 2018, **6**, 10301–10307.
9. C. Sun, Y.-H. Guo, Y. Yuan, W.-X. Chu, W.-L. He, H.-X. Che, Z.-H. Jing, C.-Y. Yue. and X.-W. Lei. Broadband White-Light Emission in One-Dimensional Organic–Inorganic Hybrid Silver Halide, *Inorg. Chem.*, 2020, **59**, 4311–4319.
10. X. Li, P. Guo, M. Kepenekian, I. Hadar, C. Katan, J. Even, C. C. Stoumpos, R. D. Schaller and M. G. Kanatzidis, Small Cyclic Diammonium Cation Templated (110)-Oriented 2D Halide (X=I, Br, Cl) Perovskites with White-Light Emission, *Chem. Mater.*, 2019, **31**, 3582–3590.
11. Z. Wu, C. Ji, Z. Sun, S. Wang, S. Zhao, W. Zhang, L. Li and J. Luo, Broadband white-light emission with a high color rendering index in a two-dimensional organic–inorganic hybrid perovskite, *J. Mater. Chem. C*, 2018, **6**, 1171–1175.
12. C.-Q. Jing, J. Wang, H.-F. Zhao, W.-X. Chu, Y. Yuan, Z. Wang, M.-F. Han, T. Xu, J.-Q. Zhao and X.-W. Lei, Improving Broadband White-Light Emission Performances of 2D Perovskites by Subtly Regulating Organic Cations, *Chem.–Eur. J.*, 2020, **26**, 10307–10313.
